# Supplementary material
Source: PubMed Central journal article supplement (PMC4508203)
Supplement: nn5039433_si_001.pdf [file nn5039433_si_001.pdf]

## Supporting Information

### Bilayer-Spanning DNA Nanopores with Voltage-Switching between Open and Closed State

*Astrid Seifert<sup>1,#</sup>, Kerstin Göpfrich<sup>2,#</sup>, Jonathan R. Burns<sup>3</sup>, Niels Fertig<sup>1</sup>, Ulrich F. Keyser<sup>2,\*</sup>,  
Stefan Howorka<sup>3,\*</sup>*

<sup>1</sup> Nanion Technologies GmbH, D-80636 Munich, Germany

<sup>2</sup> Cavendish Laboratory, University of Cambridge, Cambridge CB3 0HE, United Kingdom

<sup>3</sup> Department of Chemistry, Institute of Structural Molecular Biology, University College London, London WC1H 0AJ, United Kingdom

# These authors contributed equally to the work.

\* corresponding author: s.howorka@ucl.ac.uk, Tel 0044 20 7679 4702, ufk20@cam.ac.uk 0044 1223 337272

**Table S1.** Sequences of DNA oligonucleotides for assembling the porphyrin DNA-nanopore

| ID    | Sequence                                                                                                            |
|-------|---------------------------------------------------------------------------------------------------------------------|
| A-TPP | TTATAAGGGATTTTGCCGATTT <u>P</u> GGAATTTTACAGGATTTTCGCCT<br>GCTGGGGCAAACCAGCGTGGACCGCTTTTTTGGCTATTCTTTTGAT           |
| B-TPP | GGCGCCAATACGCTTTTTCCCGCGCGTTGGCCGATTCATTAATGC<br>AGCTGGCACGACATTTTTCTC <u>P</u> CTGGTGAAAAGAAAAACCACCT              |
| C     | TGTTCAAATAGCCAAGCGGTCCACGCTCCCTGAGGGGCGCC<br>AGGGTGGGAATCGGACAAGAGTCCACTAAAATCCCCCAGCA                              |
| D     | CATTAATTTTTCTCCTTCACCGCCTGGGGTTTGCTTATAAA<br>TCAAAAGGTTTGGACCAACGCGGGGAGCGTATTAGAGTTG                               |
| E     | CAACTCTCTCAGGGCCAGGCGGTGAAGGCAATC*A*G*C*T*G*TTGTTTTCAA*<br>C*A*G*C*A*T*C*C*TGTTTC*C*G*A*A*A*TCGGCATTAAAG*A*C*CAGCTG |
| F     | GGCGAA*A*T*GATTGCTTTCAC*C*A*G*T*G*AGATGT*C*G*T*G*A*C*G*T<br>*GGATTTTCC*A*C*G*T*T*CTTTAATAGTGGACTCTTGTTCCAAACTGGAACA |

The sequences start with the 5' terminus. p indicates a deoxy-uridine nucleotide carrying a tetra-phenyl porphyrin modification. \* signifies a phosphorothioate (PPT) modification. This modification was included in the original nanopore design to be comparable with our previous nanopore work<sup>28</sup> and to be used an alternative method to generate nanopore insertions. In this eventuality, the PPT would have been chemically modified with an ethyl group to mask the negative charge.<sup>28</sup> The ethyl-groups would have formed a hydrophobic belt at the left end of the pore (Figure S5). However, this was not necessary as the native porphyrin-nanopore inserted at pH 8.0 (for consistency) where PPT is negatively charged and behaves as a regular phosphate group. Indeed, pores with non-alkylated PPT groups do not insert into lipid bilayers.<sup>28</sup> All experiments in this manuscript were carried out using a fully negatively charged porphyrin-nanopores in a buffer at pH 8.0.

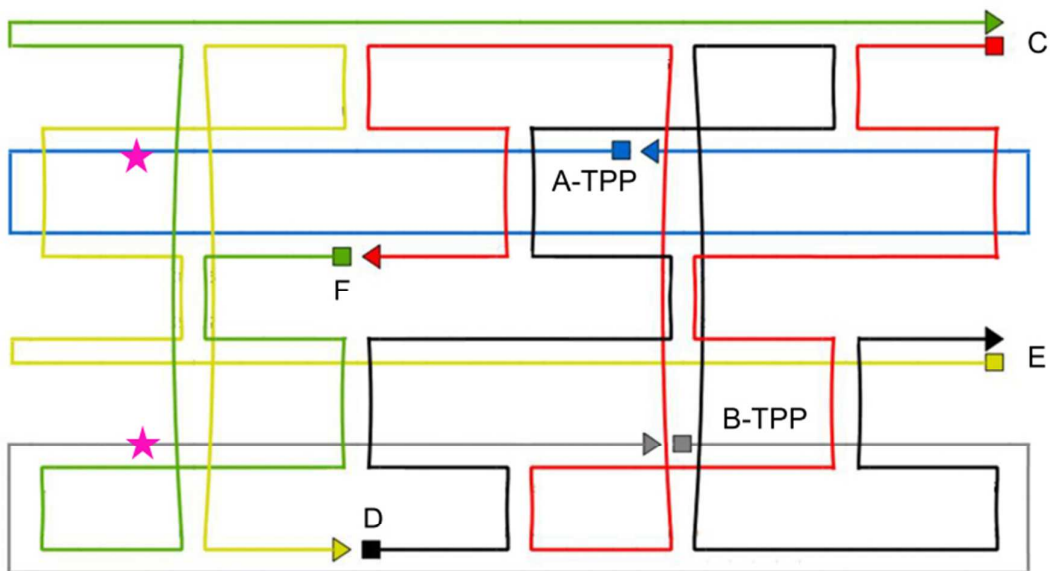

**Figure S1.** Map of the DNA nanobarrel composed of 6 DNA strands labeled by letters (Table S1). The pink stars indicate the base positions which carry a TPP porphyrin tag.

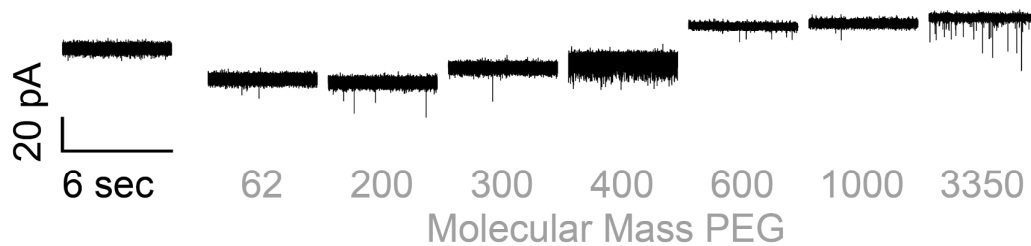

**Figure S2.** Current traces of individual pores in the absence and presence of PEG molecules of indicated molecular mass. The traces were recorded at + 40 mV.

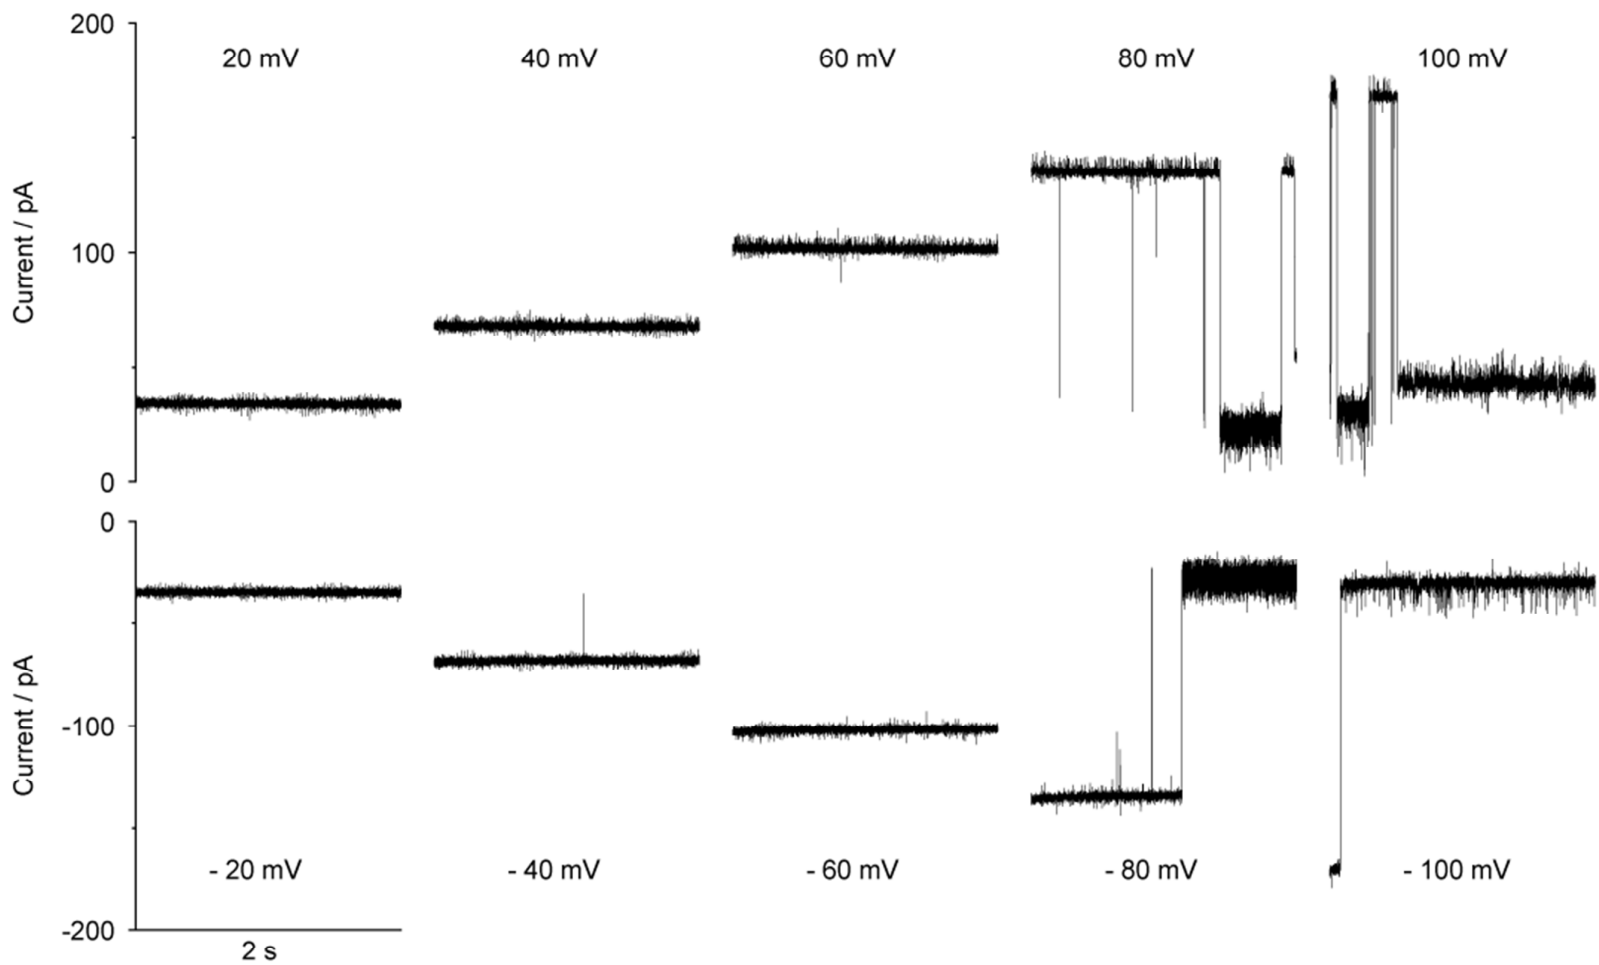

**Figure S3.** Representative single-channel current traces for a single DNA nanopore embedded in planar lipid bilayers recorded at the indicated voltages.

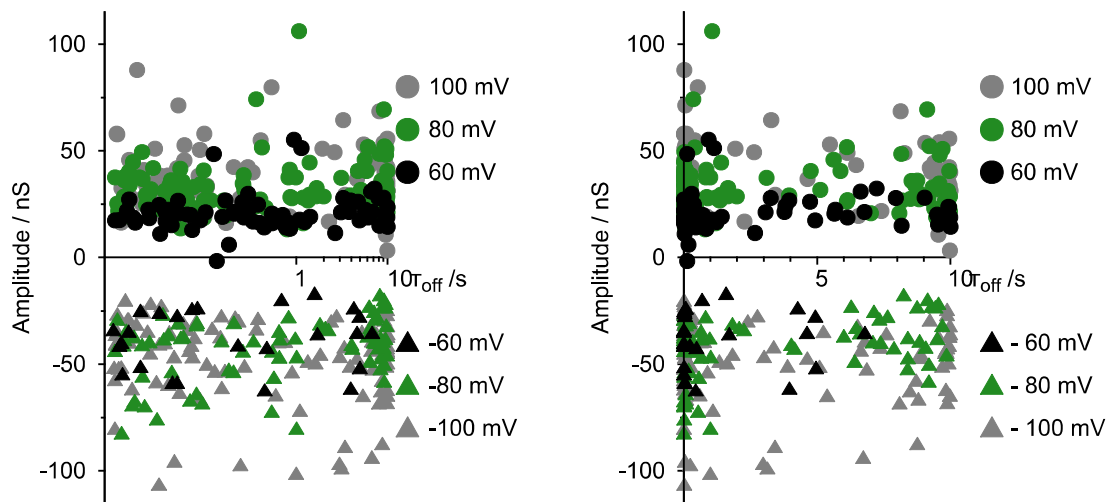

**Figure S4.** Scatter-plot analysis for amplitude  $A_b$ , and the dwell time  $\tau_{off}$  for the low-conductance blockade events to voltages +60 mV, +80 mV, +100 mV, and -60 mV, -80 mV, -100 mV, represented in a hemi-logarithmic plot (left) and linear plot (right).  $A_b$  and  $\tau_{off}$  are defined in Figure 4 of the main manuscript. The data are from current traces acquired with planar lipid bilayer recordings.

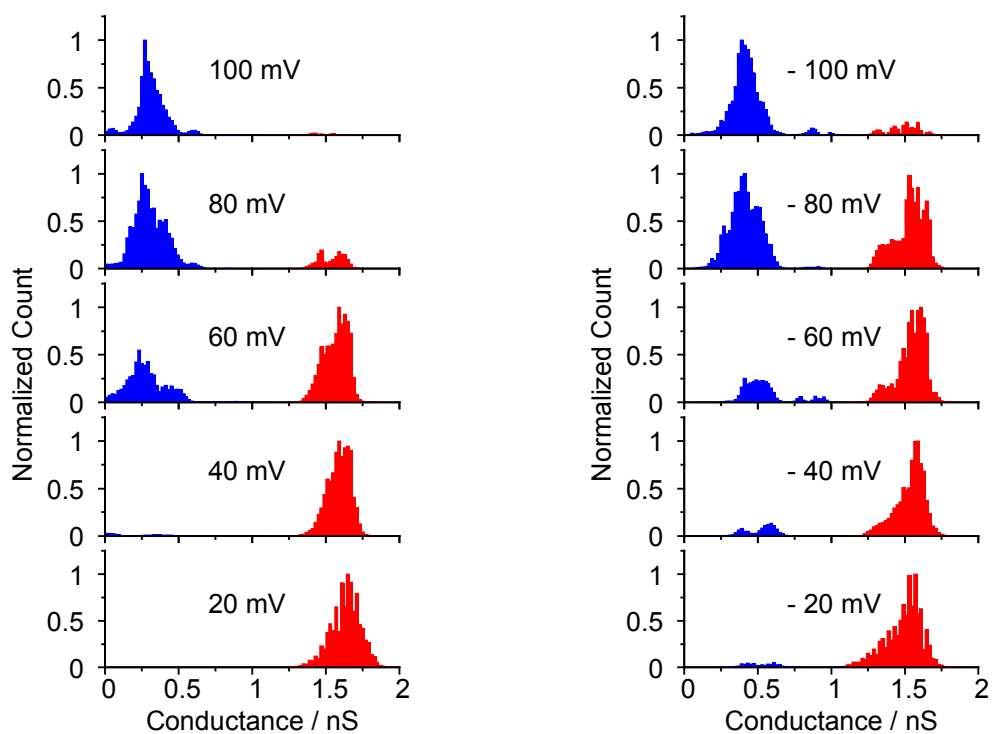

**Figure S5.** Cumulative all-point histogram of 38 single-channel current traces for negative potentials (left) and positive potentials (right). The data are from current traces acquired with planar lipid bilayer recordings.

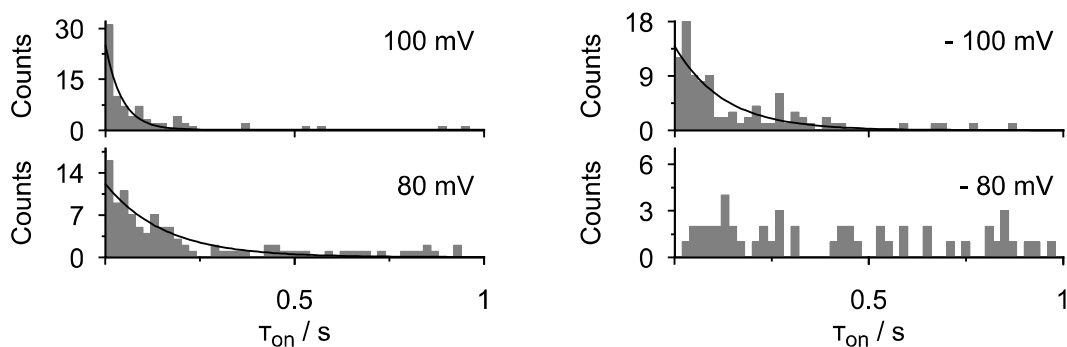

**Figure S6.** Histogram for inter-event intervals  $\tau_{on}$  for voltages of +/- 80 and +/- 100 mV. The exponential fits for  $\tau_{on}$  drop from 155 ms to 43.8 ms when increasing the voltage from +80 mV to +100 mV. The exponential fit for  $\tau_{on}$  at -100 mV is 126 ms. The data are from current traces acquired with planar lipid bilayer recordings.

**Table S2.** The occurrence of the low-conductance state as a function of voltage for traces acquired with planar lipid bilayer recordings

| Voltage [mV]                                           | 100  | 80   | 60   | 40   | 20   | -20  | -40  | -60  | -80  | -100 |
|--------------------------------------------------------|------|------|------|------|------|------|------|------|------|------|
| Mean                                                   | 112  | 414  | 2370 | 9750 | -    | -    | 9640 | 6940 | 1780 | 440  |
| $\tau_{on}$ [ms] <sup>1,2</sup>                        |      |      |      |      |      |      |      |      |      |      |
| Frequency [events/min] <sup>1</sup>                    | 16.0 | 17.2 | 10.9 | 0.57 | 0    | 0    | 0.47 | 3.85 | 10.6 | 16.1 |
| % of traces $\geq 1$ low-cond. blockade <sup>1</sup>   | 100  | 100  | 83.3 | 7.1  | 0    | 0    | 7.1  | 53.8 | 88.1 | 100  |
| % normalized proba. for low-cond. state <sup>3,4</sup> | 98.1 | 86.3 | 39.4 | 3.01 | 0.03 | 5.12 | 11.5 | 23.8 | 54.2 | 88.4 |

<sup>1</sup>The data were obtained from the analysis of 51 independently recorded single-channel DNA nanopore traces.

<sup>2</sup>The inter-event interval  $\tau_{on}$  is defined in Figure 4. <sup>3</sup>The probability for the occurrence of the low-conductance state was derived by normalizing the area of low-conductance state peak in all-point histogram to the sum of all other peaks. <sup>4</sup>The data were obtained from the analysis of 38 independently recorded single-channel DNA nanopore traces which represent a subset of the 51 current traces.

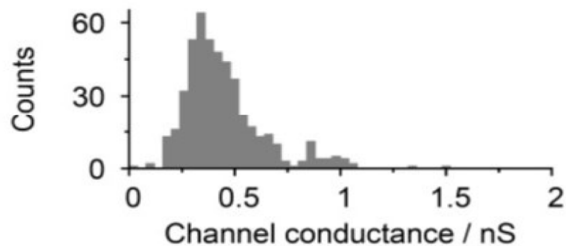

**Figure S7.** Histogram for low conductance state found for all voltages of all single-channel traces derived from all-point histogram analysis of individual traces obtained using planar lipid bilayer recordings.

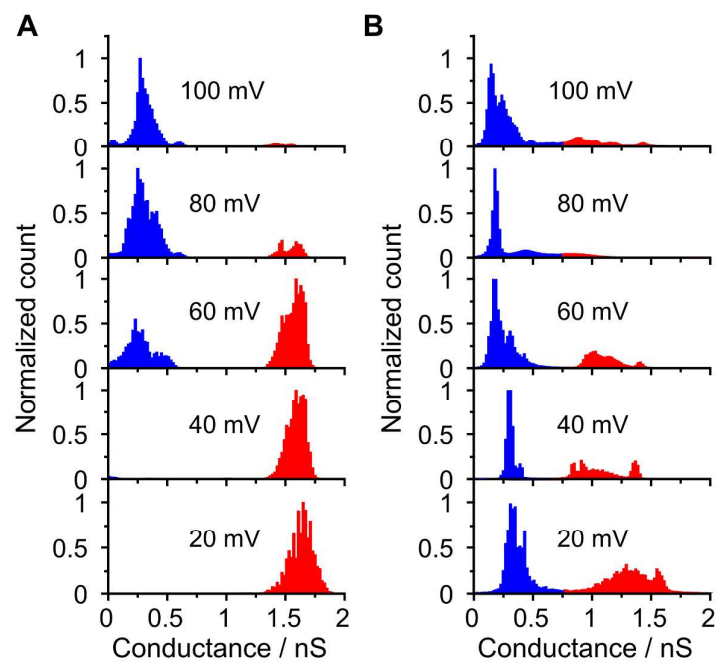

**Figure S8.** Cumulative all-point histograms for single-channel current traces acquired at the indicated voltages with (A) planar lipid bilayer recordings and (B) glass nanopipette-mounted bilayers.
